# Supplementary material for: Ascorbic Acid as an Adjunctive Therapy in Critically Ill Patients with COVID-19: A Multicenter Propensity Score Matched Study
Source: Research Square preprint supplement (doi:10.21203/rs.3.rs-354711/v1), 2021-04-02
Supplement: Supplementary file 4 [file ee09afb0fbc251907e9b534d.docx]

**Table 2 Co-existing illness**

|  | **Without Matching Using PS** | | | | **With Matching Using PS** | | | |
| --- | --- | --- | --- | --- | --- | --- | --- | --- |
|  | **Overall (739)** | **Without Ascorbic Acid (N=581)** | **Ascorbic Acid (N=158)** | **P-value** | **Overall (296)** | **Without Ascorbic Acid  (N=148)** | **Ascorbic Acid (N=148)** | **P-value** |
| Dyslipidemia (DLP) | 168 (23.2) | 122 (21.4) | 46 (29.5) | 0.0349^^ | 85 (29.0) | 43 (29.7) | 42 (28.4) | 0.8097^^ |
| Diabetes mellitus (DM) | 442 (61.0) | 348 (61.2) | 94 (60.3) | 0.8376^^ | 173 (59.0) | 83 (57.2) | 90 (60.8) | 0.5345^^ |
| Hypertension (HTN) | 412 (56.8) | 324 (56.9) | 88 (56.4) | 0.9054^^ | 165 (56.3) | 83 (57.2) | 82 (55.4) | 0.7514^^ |
| Acute Coronary Syndrome (ACS), n (%) | 12 (1.7) | 10 (1.8) | 2 (1.3) | >0.9999** | 4 (1.4) | 2 (1.4) | 2 (1.4) | >0.9999** |
| Asthma, n (%) | 62 (8.6) | 45 (7.9) | 17 (10.9) | 0.2421^^ | 30 (10.3) | 13 (9.1) | 17 (11.5) | 0.5017^^ |
| Atrial fibrillation (AFib or AF) , n (%) | 20 (2.8) | 18 (3.2) | 2 (1.3) | 0.2752** | 7 (2.4) | 5 (3.5) | 2 (1.4) | 0.2773** |
| Chronic obstructive pulmonary disease (COPD) | 15 (2.1) | 12 (2.1) | 3 (1.9) | >0.9999** | 8 (2.8) | 5 (3.5) | 3 (2.0) | 0.4965** |
| Cancer | 26 (3.6) | 21 (3.7) | 5 (3.2) | 0.7762^^ | 8 (2.8) | 4 (2.8) | 4 (2.7) | >0.9999** |
| Chronic kidney disease (CKD)- (Non-Dialysis) | 53 (7.3) | 43 (7.6) | 10 (6.5) | 0.6902** | 20 (6.9) | 11 (7.7) | 9 (6.1) | 0.9443** |
| Chronic kidney disease (CKD)- (On Dialysis) | 25 (3.5) | 22 (3.9) | 3 (1.9) | 0.6902** | 6 (2.1) | 3 (2.1) | 3 (2.0) | 0.9443** |
| Coronary artery bypass grafting (CABG) | 21 (2.9) | 18 (3.2) | 3 (1.9) | 0.5913** | 6 (2.1) | 3 (2.1) | 3 (2.0) | >0.9999** |
| Heart failure (HF) | 59 (8.0) | 52 (8.9) | 7 (4.4) | 0.0844** | 17 (5.7) | 11 (7.4) | 6 (4.1) | 0.0816** |
| Hyperthyroidism | 3 (0.4) | 3 (0.5) | 0 (0.0) | >0.9999** | 1 (0.3) | 1 (0.7) | 0 (0.0) | 0.4948** |
| Hypothyroidism | 44 (6.1) | 33 (5.8) | 11 (7.1) | 0.5525^^ | 20 (6.9) | 10 (6.9) | 10 (6.8) | 0.9619^^ |
| Ischemic heart disease (IHD) | 63 (8.5) | 50 (8.6) | 13 (8.2) | 0.4652** | 23 (7.8) | 11 (7.4) | 12 (8.1) | >0.9999** |
| Liver disease (any type) | 14 (2.0) | 9 (1.5) | 5 (3.2) | 0.4956** | 8 (2.7) | 3 (2.0) | 5 (3.4) | 0.4475** |
| Transplant | 10 (1.4) | 7 (1.2) | 3 (1.9) | 0.5625^^ | 5 (1.7) | 2 (1.4) | 3 (2.0) | 0.6284** |
| Tuberculosis | 4 (0.6) | 3 (0.5) | 1 (0.6) | >0.9999** | 1 (0.3) | 0 (0.0) | 1 (0.7) | >0.9999** |
| Venous thromboembolism (VTE) (PE_DVT) | 9 (1.2) | 7 (1.2) | 2 (1.3) | >0.9999** | 3 (1.0) | 1 (0.7) | 2 (1.4) | >0.9999** |
| *T Test / ^ Wilcoxon rank sum test is used to calculate the P-value.  PS: Propensity score  ^^ Chi square/ ** Fisher’s Exact teat is used to calculate P-value. | | | | | | | | |
